# Supplementary material
Source: Springer Nature journal article supplement (https://www.springermedizin.de/resource/supplementary/12885_2013_4118_MOESM7_ESM.pdf/9465426)

**RAD51B**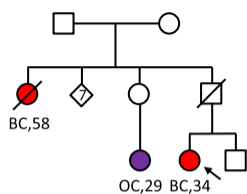

c.452+3A&gt;G

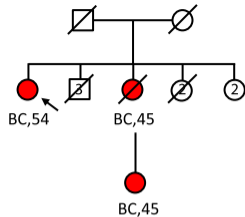

c.475C&gt;T/p.Arg159Cys

**XRCC3**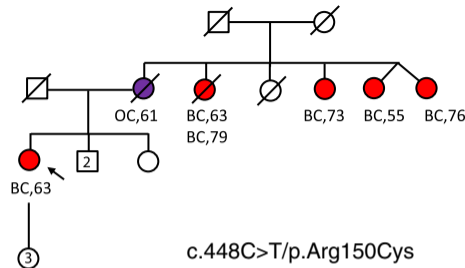

c.448C&gt;T/p.Arg150Cys

**RAD51C**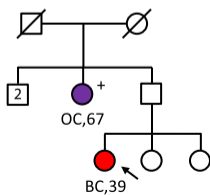

c.706-2A&gt;G

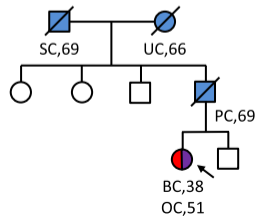

c.1026+5\_1026+4del

Supplement: MOESM7 [file 9465426]
